# Supplementary material for: Quantitative analyses of T cell motion in tissue reveals factors driving T cell search in tissues
Source: eLife. 2023 Oct 23;12:e84916. doi: 10.7554/eLife.84916 (PMC10672806; doi:10.7554/eLife.84916)
Supplement: Figure 1—figure supplement 3—source data 1. [file elife-84916-fig1-figsupp3-data1.xlsx]

## Sheet: Sheet1
Figure 1 - figure supplement 3 D
	LN	Villi	Lung (Flu)	Lung (LPS)
LN	1	0.93	0.26	< 2.e-16
Villi	0.93	1	0.024	< 2.e-16
Lung (Flu)	0.26	0.024	1	9.2e-10
Lung (LPS)	< 2.e-16	< 2.e-16	9.2e-10	1
