# Supplementary material for: Quantitative analyses of T cell motion in tissue reveals factors driving T cell search in tissues
Source: eLife. 2023 Oct 23;12:e84916. doi: 10.7554/eLife.84916 (PMC10672806; doi:10.7554/eLife.84916)
Supplement: Figure 1—figure supplement 3—source data 2. [file elife-84916-fig1-figsupp3-data2.xlsx]

## Sheet: Sheet1
Figure 1 - figure supplement 3 E
	LN	Villi	Lung (Flu)	Lung (LPS)
LN	1	1	< 2.e-16	< 2.e-16
Villi	1	1	< 2.e-16	< 2.e-16
Lung (Flu)	< 2.e-16	< 2.e-16	1	1
Lung (LPS)	< 2.e-16	< 2.e-16	1	1
