# Supplementary material for: Quantitative analyses of T cell motion in tissue reveals factors driving T cell search in tissues
Source: eLife. 2023 Oct 23;12:e84916. doi: 10.7554/eLife.84916 (PMC10672806; doi:10.7554/eLife.84916)
Supplement: Figure 2—figure supplement 2—source data 1. [file elife-84916-fig2-figsupp2-data1.xlsx]

## Sheet: Sheet1
Figure 2 - figure supplement 2 C
	LN	Villi	Lung (Flu)	Lung (LPS)
LN	1	0.0029	< 2.e-16	< 2.e-16
Villi	0.0029	1	1.6e-07	2e-06
Lung (Flu)	< 2.e-16	1.6e-07	1	1
Lung (LPS)	< 2.e-16	2e-06	1	1
