# Supplementary material for: Quantitative analyses of T cell motion in tissue reveals factors driving T cell search in tissues
Source: eLife. 2023 Oct 23;12:e84916. doi: 10.7554/eLife.84916 (PMC10672806; doi:10.7554/eLife.84916)
Supplement: Figure 4—figure supplement 2—source data 1. [file elife-84916-fig4-figsupp2-data1.xlsx]

## Sheet: Sheet1
Figure 4 - figure supplement 2 B
	LN	Villi	Lung (Flu)	Lung (LPS)
LN	1	0.0082	< 2.e-16	< 2.e-16
Villi	0.0082	1	< 2.e-16	< 2.e-16
Lung (Flu)	< 2.e-16	< 2.e-16	1	2.4e-06
Lung (LPS)	< 2.e-16	< 2.e-16	2.4e-06	1
