# Supplementary material for: Quantitative analyses of T cell motion in tissue reveals factors driving T cell search in tissues
Source: eLife. 2023 Oct 23;12:e84916. doi: 10.7554/eLife.84916 (PMC10672806; doi:10.7554/eLife.84916)
Supplement: Figure 5—figure supplement 2—source data 2. [file elife-84916-fig5-figsupp2-data2.xlsx]

## Sheet: Sheet1
Figure 5 - figure supplement 2 C
	LN	Villi	Lung (Flu)	Lung (LPS)
LN	1	1	< 2.e-16	< 2.e-16
Villi	1	1	4e-14	< 2.e-16
Lung (Flu)	< 2.e-16	4e-14	1	5.3e-06
Lung (LPS)	< 2.e-16	< 2.e-16	5.3e-06	1
